# Supplementary material for: Plasma receptor tyrosine kinase RET in pulmonary arterial hypertension diagnosis and differentiation
Source: PubMed Central journal article supplement — ERJ Open Res. 2019 Nov 15;5(4):00037-2019. doi: 10.1183/23120541.00037-2019 (PMC6856495; doi:10.1183/23120541.00037-2019), 2019-11-15
Supplement: 00037-2019.tableS1.pdf [file 00037-2019.tableS1.pdf]

**Table S1. Multiple comparison between all groups**

|                        | Ang-1   | Tie2     | VEGF-A   | VEGF-D   | PlGF     | VEGFR-2  | VEGFR-3 | EGF     | EGFR     | HER2     | HER3    | HER4     | Amphiregulin | HB-EGF  | TGF- $\alpha$ |
|------------------------|---------|----------|----------|----------|----------|----------|---------|---------|----------|----------|---------|----------|--------------|---------|---------------|
| CONTROL vs. PAH        | >0.9999 | >0.9999  | <0.0001* | 0.0095*  | <0.0001* | 0.0023*  | >0.9999 | 0.4659  | <0.0001* | >0.9999  | 0.1198  | >0.9999  | <0.0001*     | >0.9999 | 0.0001*       |
| CONTROL vs. CTEPH      | 0.4444  | 0.0423*  | <0.0001* | 0.0017*  | 0.0006*  | 0.0352*  | >0.9999 | >0.9999 | <0.0001* | >0.9999  | >0.9999 | >0.9999  | 0.0004*      | 0.1326  | <0.0001*      |
| CONTROL vs. PH-HFpEF   | >0.9999 | 0.0598   | <0.0001* | <0.0001* | <0.0001* | <0.0001* | >0.9999 | >0.9999 | <0.0001* | >0.9999  | 0.5497  | >0.9999  | <0.0001*     | >0.9999 | <0.0001*      |
| CONTROL vs. PH-HFrEF   | >0.9999 | <0.0001* | 0.0006*  | <0.0001* | <0.0001* | 0.0073*  | 0.0030* | 0.0122* | 0.0027*  | 0.0092*  | >0.9999 | 0.0024*  | <0.0001*     | >0.9999 | <0.0001*      |
| CONTROL vs. NON-PH-HF  | >0.9999 | 0.0245*  | 0.0120*  | 0.0672   | 0.0005*  | 0.0073*  | >0.9999 | >0.9999 | 0.0078*  | >0.9999  | >0.9999 | >0.9999  | 0.0133*      | >0.9999 | 0.0416*       |
| PAH vs. CTEPH          | 0.2166  | 0.3507   | >0.9999  | >0.9999  | >0.9999  | >0.9999  | >0.9999 | >0.9999 | >0.9999  | 0.2584   | 0.1106  | >0.9999  | >0.9999      | 0.0105* | >0.9999       |
| PAH vs. PH-HFpEF       | >0.9999 | 0.5362   | >0.9999  | >0.9999  | 0.1912   | 0.3312   | >0.9999 | >0.9999 | >0.9999  | >0.9999  | >0.9999 | >0.9999  | >0.9999      | >0.9999 | >0.9999       |
| PAH vs. PH-HFrEF       | >0.9999 | <0.0001* | >0.9999  | <0.0001* | >0.9999  | >0.9999  | 0.0333* | >0.9999 | 0.0013*  | <0.0001* | 0.1863  | <0.0001* | >0.9999      | >0.9999 | >0.9999       |
| PAH vs. NON-PH-HF      | >0.9999 | 0.1949   | >0.9999  | >0.9999  | >0.9999  | >0.9999  | >0.9999 | >0.9999 | 0.2189   | 0.0571   | >0.9999 | 0.6690   | >0.9999      | >0.9999 | >0.9999       |
| CTEPH vs. PH-HFpEF     | >0.9999 | >0.9999  | >0.9999  | >0.9999  | 0.8866   | 0.6776   | >0.9999 | >0.9999 | >0.9999  | >0.9999  | 0.5319  | >0.9999  | >0.9999      | 0.7964  | >0.9999       |
| CTEPH vs. PH-HFrEF     | 0.0072* | 0.5001   | >0.9999  | 0.0097*  | >0.9999  | >0.9999  | 0.6456  | 0.5827  | >0.9999  | 0.2622   | >0.9999 | 0.0925   | >0.9999      | 0.0103* | >0.9999       |
| CTEPH vs. NON-PH-HF    | >0.9999 | >0.9999  | >0.9999  | >0.9999  | >0.9999  | >0.9999  | >0.9999 | >0.9999 | >0.9999  | >0.9999  | >0.9999 | >0.9999  | >0.9999      | >0.9999 | >0.9999       |
| PH-HFpEF vs. PH-HFrEF  | 0.4797  | 0.0410*  | 0.5368   | 0.0043*  | 0.3131   | 0.3564   | 0.1315  | 0.0949  | 0.5570   | 0.0010*  | >0.9999 | 0.0012*  | >0.9999      | >0.9999 | >0.9999       |
| PH-HFpEF vs. NON-PH-HF | >0.9999 | >0.9999  | >0.9999  | >0.9999  | >0.9999  | >0.9999  | >0.9999 | >0.9999 | >0.9999  | >0.9999  | >0.9999 | >0.9999  | >0.9999      | >0.9999 | >0.9999       |
| PH-HFrEF vs. NON-PH-HF | 0.5090  | >0.9999  | >0.9999  | 0.0014*  | >0.9999  | >0.9999  | 0.4143  | 0.4349  | >0.9999  | >0.9999  | >0.9999 | >0.9999  | 0.5583       | 0.9294  | 0.9624        |

**Table S1. (continued)**

|                        | PDGF subunit A | PDGF subunit B | SRC     | LYN     | ABL1           | EPHA2              | EPHB4          | AXL            | MERTK              | SCF                | HGF                | FGF-BP1            | RET                |
|------------------------|----------------|----------------|---------|---------|----------------|--------------------|----------------|----------------|--------------------|--------------------|--------------------|--------------------|--------------------|
| CONTROL vs. PAH        | >0.9999        | >0.9999        | >0.9999 | >0.9999 | >0.9999        | <b>0.0009*</b>     | >0.9999        | >0.9999        | <b>0.0089*</b>     | <b>0.0073*</b>     | <b>&lt;0.0001*</b> | <b>0.0045*</b>     | <b>&lt;0.0001*</b> |
| CONTROL vs. CTEPH      | 0.6344         | >0.9999        | >0.9999 | >0.9999 | >0.9999        | 0.4177             | >0.9999        | >0.9999        | <b>0.0001*</b>     | >0.9999            | <b>0.0003*</b>     | 0.0668             | >0.9999            |
| CONTROL vs. PH-HFpEF   | >0.9999        | >0.9999        | >0.9999 | >0.9999 | >0.9999        | <b>&lt;0.0001*</b> | <b>0.0173*</b> | >0.9999        | <b>&lt;0.0001*</b> | 0.4753             | <b>&lt;0.0001*</b> | 0.0613             | >0.9999            |
| CONTROL vs. PH-HFrEF   | >0.9999        | 0.4410         | >0.9999 | 0.9378  | >0.9999        | <b>0.0233*</b>     | 0.0886         | 0.1600         | <b>&lt;0.0001*</b> | <b>&lt;0.0001*</b> | <b>&lt;0.0001*</b> | <b>&lt;0.0001*</b> | >0.9999            |
| CONTROL vs. NON-PH-HF  | >0.9999        | >0.9999        | >0.9999 | >0.9999 | >0.9999        | <b>0.0422*</b>     | >0.9999        | >0.9999        | <b>0.0001*</b>     | 0.3405             | <b>&lt;0.0001*</b> | 0.8632             | >0.9999            |
| PAH vs. CTEPH          | 0.0658         | >0.9999        | >0.9999 | >0.9999 | >0.9999        | >0.9999            | >0.9999        | >0.9999        | >0.9999            | 0.2612             | >0.9999            | >0.9999            | <b>0.0088*</b>     |
| PAH vs. PH-HFpEF       | >0.9999        | >0.9999        | >0.9999 | >0.9999 | <b>0.0276*</b> | >0.9999            | <b>0.0434*</b> | 0.6204         | >0.9999            | >0.9999            | >0.9999            | >0.9999            | <b>0.0174*</b>     |
| PAH vs. PH-HFrEF       | >0.9999        | >0.9999        | >0.9999 | >0.9999 | >0.9999        | >0.9999            | 0.2738         | <b>0.0046*</b> | >0.9999            | 0.5086             | 0.2991             | >0.9999            | <b>0.0017*</b>     |
| PAH vs. NON-PH-HF      | >0.9999        | >0.9999        | >0.9999 | >0.9999 | 0.0785         | >0.9999            | >0.9999        | >0.9999        | >0.9999            | >0.9999            | >0.9999            | >0.9999            | <b>0.0374*</b>     |
| CTEPH vs. PH-HFpEF     | >0.9999        | >0.9999        | >0.9999 | >0.9999 | >0.9999        | 0.0838             | 0.6903         | 0.2150         | >0.9999            | >0.9999            | >0.9999            | >0.9999            | >0.9999            |
| CTEPH vs. PH-HFrEF     | <b>0.0344*</b> | 0.0507         | >0.9999 | >0.9999 | >0.9999        | >0.9999            | >0.9999        | <b>0.0034*</b> | >0.9999            | <b>0.0012*</b>     | >0.9999            | >0.9999            | >0.9999            |
| CTEPH vs. NON-PH-HF    | >0.9999        | >0.9999        | >0.9999 | >0.9999 | >0.9999        | >0.9999            | >0.9999        | 0.8346         | >0.9999            | >0.9999            | >0.9999            | >0.9999            | >0.9999            |
| PH-HFpEF vs. PH-HFrEF  | >0.9999        | 0.4226         | >0.9999 | 0.5541  | 0.8982         | 0.2304             | >0.9999        | >0.9999        | >0.9999            | <b>0.0151*</b>     | >0.9999            | 0.7581             | >0.9999            |
| PH-HFpEF vs. NON-PH-HF | >0.9999        | >0.9999        | >0.9999 | >0.9999 | >0.9999        | >0.9999            | >0.9999        | >0.9999        | >0.9999            | >0.9999            | >0.9999            | >0.9999            | >0.9999            |
| PH-HFrEF vs. NON-PH-HF | >0.9999        | >0.9999        | 0.7530  | 0.6887  | 0.9154         | >0.9999            | >0.9999        | >0.9999        | >0.9999            | 0.6187             | >0.9999            | 0.5476             | >0.9999            |

PAH: pulmonary arterial hypertension; CTEPH: chronic thromboembolic pulmonary hypertension; PH-HFpEF: PH due to diastolic heart failure; PH-HFrEF: PH due to systolic heart failure; NON-PH-HF: heart failure without pulmonary hypertension. Ang-1: angiotensin 1; Tie2: angiotensin receptor TEK tyrosine kinase; VEGF-A and D: vascular endothelial growth factor-A and -D; PlGF: placental growth factor; VEGFR-2 and -3: vascular endothelial growth factor receptor-2 and 3; PDGF subunit A and B: platelet-derived growth factor subunit A and B; HER2: human epidermal growth factor receptor 2; HER3: human epidermal growth factor receptor 3; HER4: human epidermal growth factor receptor 4; EGF: epidermal growth factor; EGFR: epidermal growth factor receptor; HB-EGF: heparin-binding EGF-like growth factor; TGF- $\alpha$ : transforming growth factor  $\alpha$ ; SRC: proto-oncogene tyrosine-protein kinase Src; LYN: tyrosine-protein kinase Lyn; ABL-1: tyrosine-protein kinase ABL1; EPHA2: ephrin type-A receptor 2; EPHB4: ephrin type-B receptor 4; AXL: tyrosine-protein kinase receptor UFO; MERTK: tyrosine-protein kinase MER; SCF: stem cell factor; HGF: hepatocyte growth factor; FGF-BP1: fibroblast growth factor-binding protein 1; RET: proto-oncogene tyrosine-protein kinase receptor Ret. Variables are presented as p-values (Kruskal-Wallis test). \* indicates p<0.05.
